# Supplementary material for: Tracking of Dietary Intake and Diet Quality from Late Pregnancy to the Postpartum Period
Source: Nutrients. 2019 Sep 3;11(9):2080. doi: 10.3390/nu11092080 (PMC6769665; doi:10.3390/nu11092080)
Supplement: Supplementary file 1 [file nutrients-11-02080-s001.pdf]

**Table S1.** Components of Canadian adaptation of Healthy Eating Index, range of scores and scoring criteria.

| Component                        | Scoring criteria (daily servings) * |                            |
|----------------------------------|-------------------------------------|----------------------------|
|                                  | Minimum score                       | Maximum score              |
| <b>Adequacy</b> †                |                                     |                            |
| Total vegetables and fruit       | 0                                   | 4 to 10 servings           |
| Whole fruit                      | 0                                   | 0.8 to 2.1 servings        |
| Dark green and orange vegetables | 0                                   | 0.8 to 2.1 servings        |
| Total grain products             | 0                                   | 3 to 8 servings            |
| Whole grains                     | 0                                   | 1.5 to 4 servings          |
| Milk and alternatives            | 0                                   | 2 to 4 servings            |
| Meat and alternatives            | 0                                   | 1 to 3 servings            |
| Unsaturated fats                 | 0                                   | 30 to 45 grams/day §       |
| <b>Moderation</b> ‡              |                                     |                            |
| Saturated fats                   | ≥15% of total energy intake         | ≤7% of total energy intake |
| Sodium                           | Twice the UL                        | AI or less (≤1500 mg)      |
| Other foods                      | ≥40% of total energy intake         | ≤5% of total energy intake |

Adapted from Garriguet D. (2009); UL, Upper Intake limit; AI, Adequate intake. \* according to age and sex, as specified in Canada's Food Guide. † for adequacy components, 0 points for minimum intake or less, 5, 10 or 20 for maximum intake or more, and proportional for amounts between minimum and maximum. ‡ for moderation components, 10 or 20 points for minimum intake or less, 0 points for maximum intake or more, and proportional for amounts between minimum and maximum. § Refers only to the amount of unsaturated fats added directly to food during cooking or through salad dressings and does not represents total dietary intake of unsaturated fats.

**Table S2.** Period-specific macronutrient intake in comparison with dietary reference intakes.

|                           | 3 <sup>rd</sup> trimester of pregnancy |                        |                        | 3 months postpartum |                     |                        | 6 months postpartum |                        |                     | Overall <i>p</i> -Value <sup>a</sup> |
|---------------------------|----------------------------------------|------------------------|------------------------|---------------------|---------------------|------------------------|---------------------|------------------------|---------------------|--------------------------------------|
|                           | Mean ± SD                              | %Below<br>EPR or<br>AI | %Above<br>EPR or<br>AI | Mean ± SD           | %Below<br>EPR or AI | %Above<br>EPR or<br>AI | Mean ± SD           | %Below<br>EPR or<br>AI | %Above<br>EPR or AI |                                      |
| EPR, g/day                | 95.7 ± 9.4                             | -                      | -                      | 83.9 ± 10.1         | -                   | -                      | 80.2 ± 12.6         | -                      | -                   | -                                    |
| Protein, g/day            | 100 ± 19                               | 36                     | 64                     | 97.1 ± 18.9         | 25                  | 75                     | 93.2 ± 21.6         | 25                     | 75                  | 0.22                                 |
| Carbohydrate, g/day       | 283 ± 64                               | -                      | -                      | 266 ± 68            | -                   | -                      | 259 ± 65            | -                      | -                   | 0.11                                 |
| Total fat, g/day          | 91.9 ± 22.7                            | -                      | -                      | 93.8 ± 24.5         | -                   | -                      | 90.5 ± 23.5         | -                      | -                   | 0.75                                 |
| Dietary fiber, g/day      | 24.6 ± 5.6                             | 89                     | 11                     | 22.0 ± 4.5          | 93                  | 7                      | 21.3 ± 6.6          | 89                     | 11                  | 0.01                                 |
| ω-6 Linoleic acid, g/day  | 9.6 ± 5.6                              | -                      | -                      | 11.1 ± 5.6          | -                   | -                      | 11.1 ± 5.3          | -                      | -                   | 0.23                                 |
| ω-3 Linolenic acid, g/day | 2.0 ± 1.0                              | -                      | -                      | 2.1 ± 1.0           | -                   | -                      | 2.1 ± 0.8           | -                      | -                   | 0.84                                 |
| Cholesterol, mg/day       | 297 ± 105                              | -                      | -                      | 293 ± 120           | -                   | -                      | 306 ± 128           | -                      | -                   | 0.87                                 |

<sup>a</sup> *p*-value for repeated measures ANOVA performed to assess variations in macronutrient intake across periods. When no dietary reference intake was established for a nutrient, the “-” is used instead of a 0. EPR: estimated protein requirement (1.1 g/kg of pre-pregnancy weight + 25 g for the third trimester and 1.3 g/kg for participants who breastfed or 0.8 g/kg for those who didn’t in the postpartum period). AI: adequate intake (14 g of fiber/1000 kcal consumed).
